# Supplementary figures and images for: Intravenous administration of viral vectors expressing prostate cancer antigens enhances the magnitude and functionality of CD8+ T cell responses
Source: HighWire-hosted journal article supplement (doi:10.1136/jitc-2022-005398), 2022-11-01

**Singlet, live, CD3+CD8+ T cells**

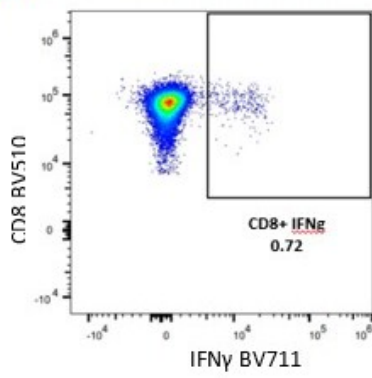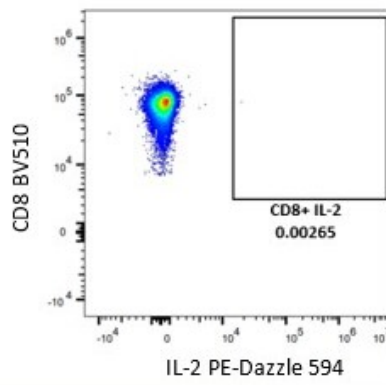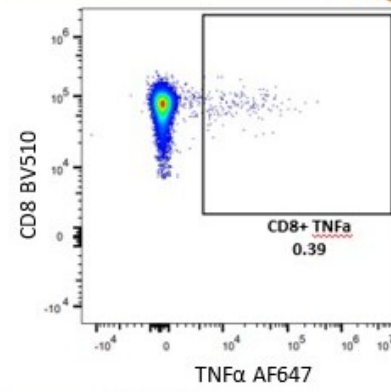

Supplement: jitc-2022-005398supp002_data_supplement.pdf [file jitc-2022-005398supp002_data_supplement.pdf]
